# Supplementary material for: A Portable Servoregulation Controller to Automate CO2 Removal in Artificial Lungs
Source: MDPI journal article supplement (doi:10.3390/bioengineering9100593), 2022-10-21
Supplement: s1 [file s1]

# Supplementary Materials: A Portable Servoregulation Controller to Automate CO<sub>2</sub> Removal in Artificial Lungs

Navid Shaikh , Andrew Zhang, Jesse Jenter, Brandon Nikpreljevic, John Toomasian, William Lynch, Alvaro Rojas-Peña, Robert H. Bartlett, and Joseph A. Potkay 

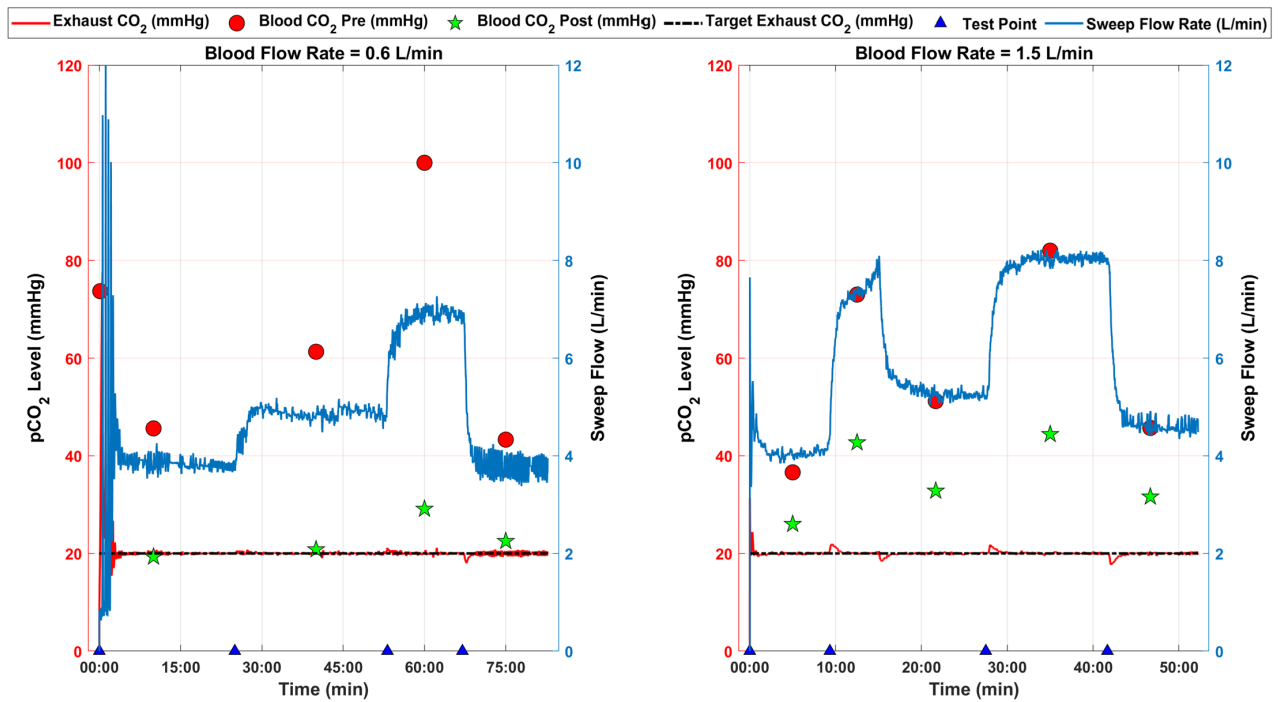

**Figure S1.** Data from *in vitro* studies at Artificial Lung(AL) blood flow rate of 0.6 L/min and 1.5 L/min. The target exhaust CO<sub>2</sub> level was maintained at 20 mmHg. The blue arrows represent the time points when the inlet blood pCO<sub>2</sub> levels were changed to challenge the tuning of the PID controller.

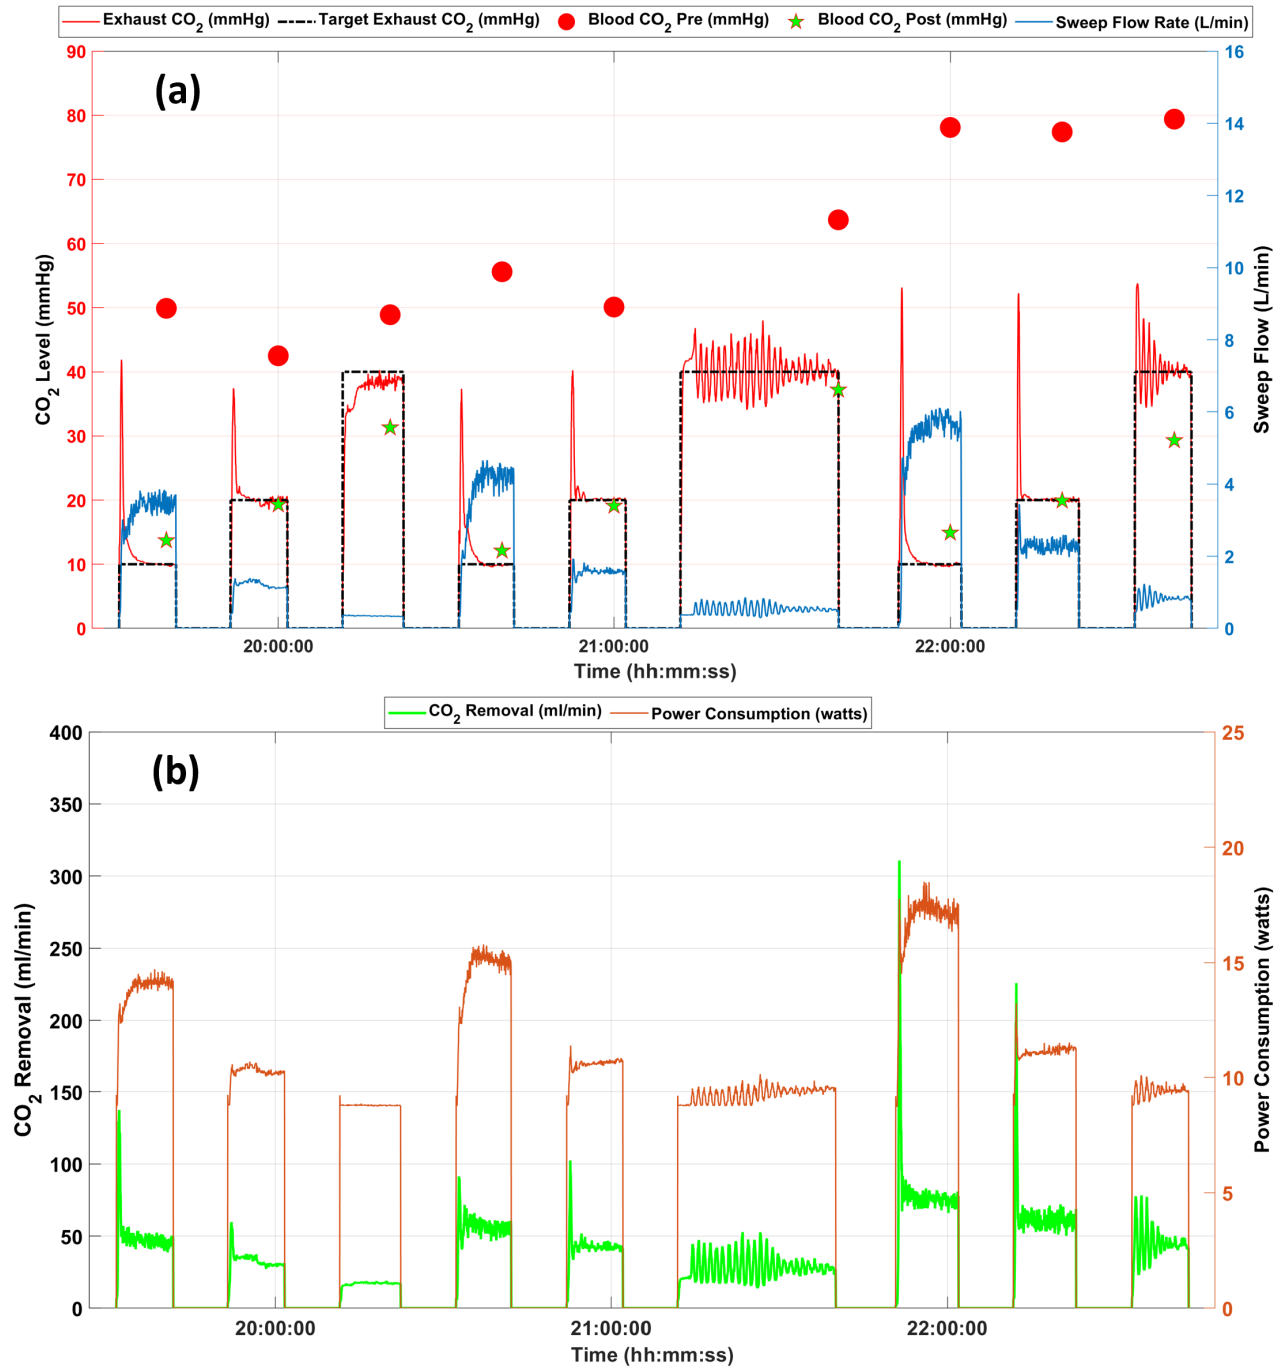

**Figure S2.** Raw data from *in vitro* studies at AL blood flow rate of 0.5 L/min showing (a) exhaust CO<sub>2</sub> levels, target exhaust CO<sub>2</sub> levels, sweep flow rates. (b) instantaneous CO<sub>2</sub> removal rate and system power consumption.

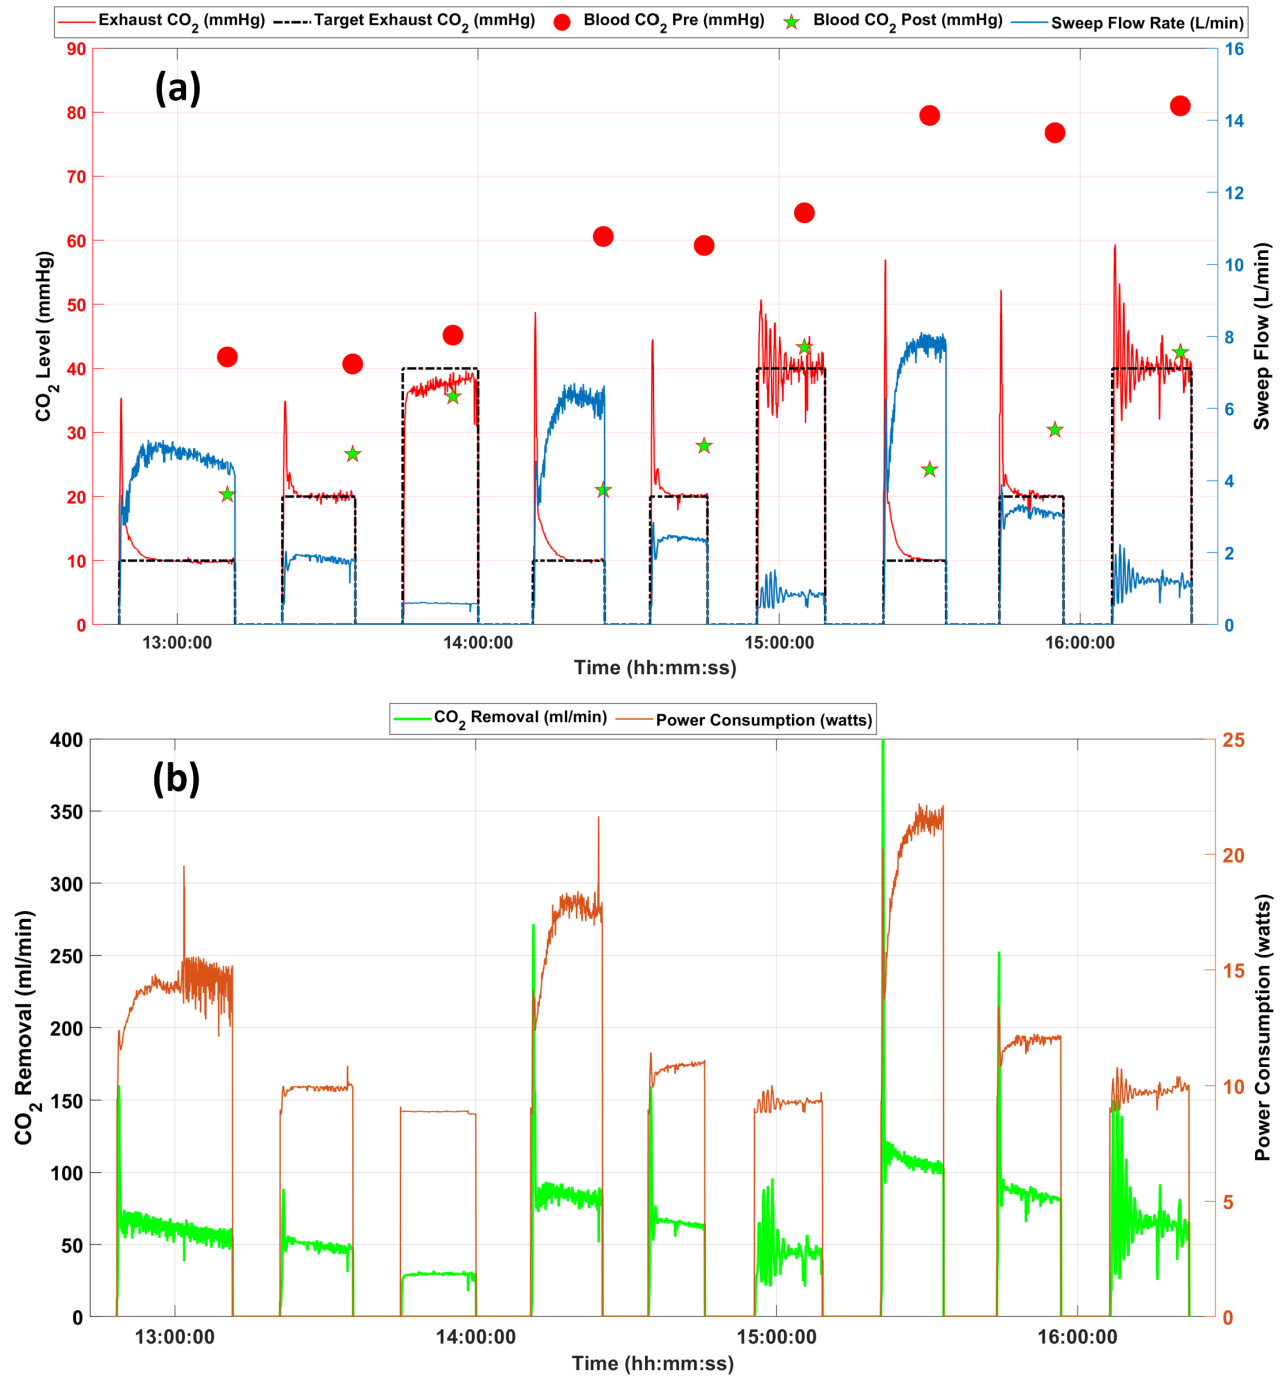

**Figure S3.** Raw data from *in vitro* studies at AL blood flow rate of 1.0 L/min showing (a) exhaust CO<sub>2</sub> levels, target exhaust CO<sub>2</sub> levels, sweep flow rates. (b) instantaneous CO<sub>2</sub> removal rate and system power consumption.

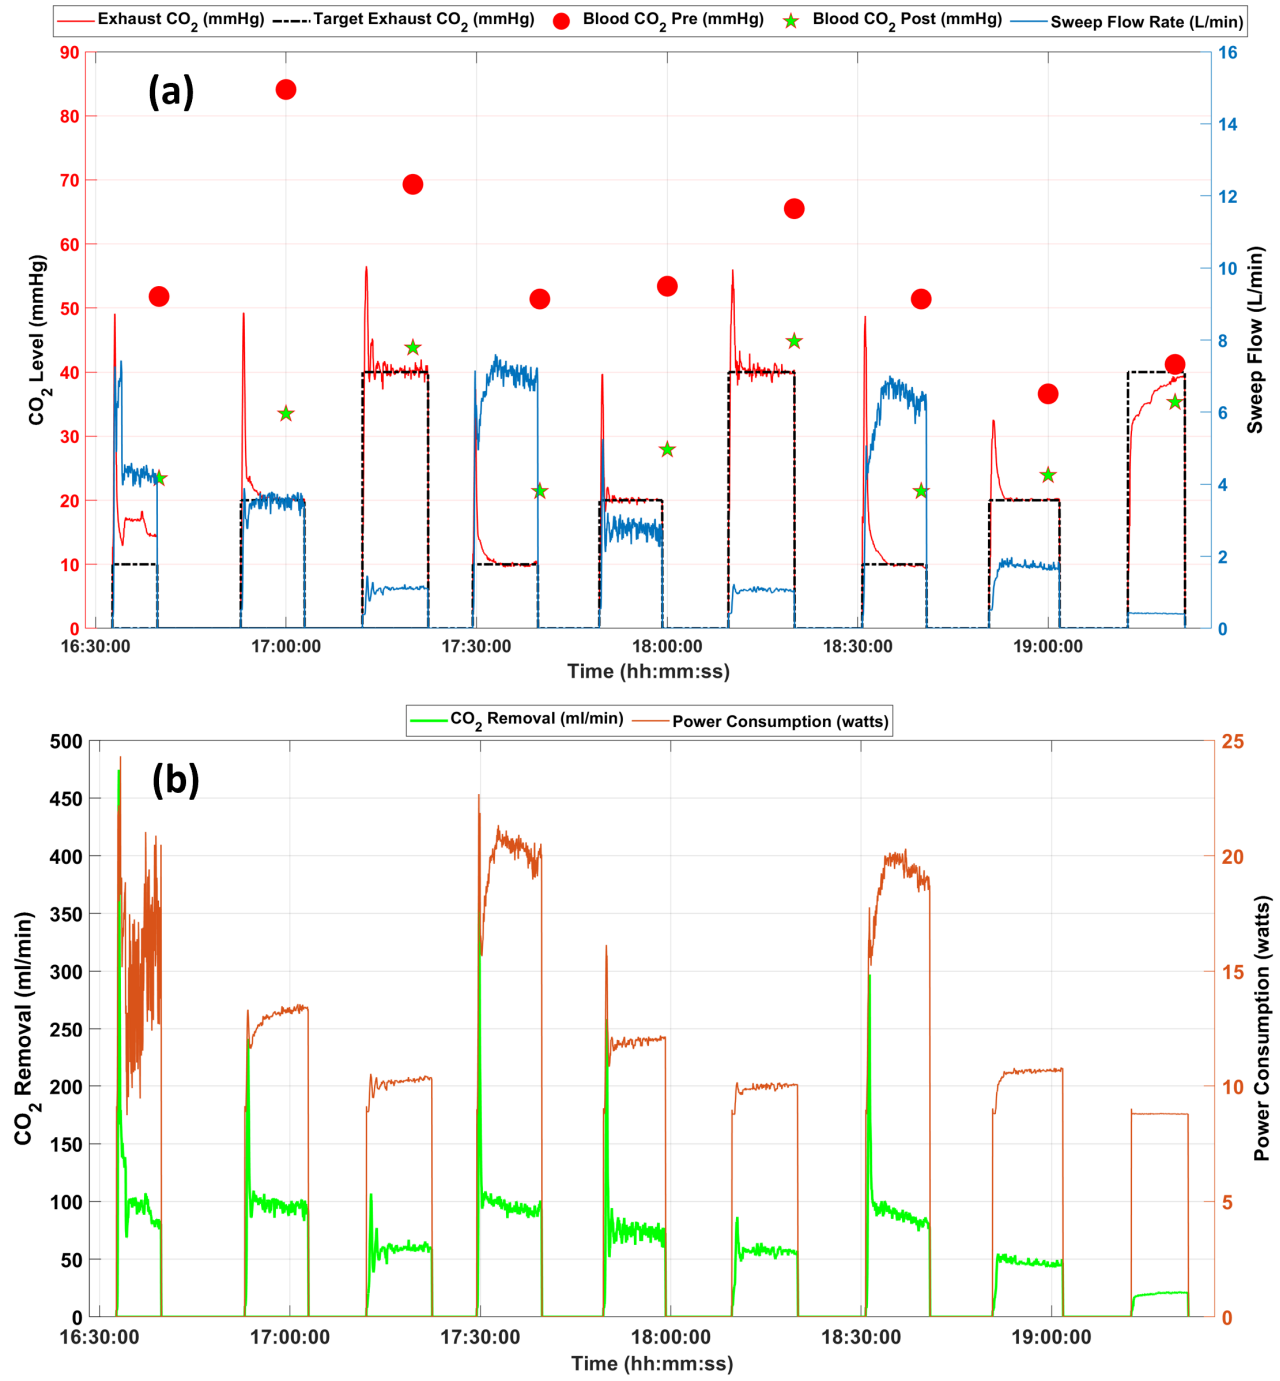

**Figure S4.** Raw data from *in vitro* studies at AL blood flow rate of 1.5 L/min showing (a) exhaust CO<sub>2</sub> levels, target exhaust CO<sub>2</sub> levels, sweep flow rates. (b) instantaneous CO<sub>2</sub> removal rate and system power consumption.
